# Supplementary material for: Profiling Risk Factors for Household and Community Spatiotemporal Clusters of Q Fever Notifications in Queensland between 2002 and 2017
Source: MDPI journal article supplement (doi:10.3390/pathogens11080830), 2022-07-25
Supplement: s1 [file s1]

## Supplementary Materials

**Table S1.** Q fever clustering using space-time analysis in Queensland between 2002 and 2017

| ID | Radius (Km) | LLR   | P value | Observed cases | Expected cases | RR        | Population | LGA                     | YEAR | Cluster |
|----|-------------|-------|---------|----------------|----------------|-----------|------------|-------------------------|------|---------|
| 1  | 0.000       | 51.46 | 0.00    | 6              | 0.00           | 14453.22  | 86         | Paroo Shire             | 2002 | H       |
| 2  | 0.000       | 40.48 | 0.00    | 5              | 0.00           | 8920.27   | 118        | Gympie Regional         | 2008 | H       |
| 3  | 1.350       | 40.16 | 0.00    | 6              | 0.00           | 2196.07   | 566        | Murweh Shire            | 2015 | C       |
| 4  | 0.785       | 36.87 | 0.00    | 5              | 0.00           | 4334.63   | 235        | Maranoa Regional        | 2006 | C       |
| 5  | 9.664       | 33.77 | 0.00    | 8              | 0.04           | 184.39    | 9146       | Townsville City         | 2012 | C       |
| 6  | 0.784       | 31.57 | 0.00    | 5              | 0.00           | 1501.31   | 713        | Balonne Shire           | 2002 | H       |
| 7  | 0.000       | 25.45 | 0.00    | 3              | 0.00           | 13131.61  | 93         | Ipswich City            | 2013 | H       |
| 8  | 0.000       | 25.28 | 0.00    | 2              | 0.00           | 840911.35 | 1          | South Burnett Regional  | 2013 | H       |
| 9  | 0.000       | 24.88 | 0.00    | 3              | 0.00           | 10878.86  | 116        | Gold Coast City         | 2003 | H       |
| 10 | 0.000       | 24.59 | 0.00    | 3              | 0.00           | 9871.82   | 65         | Toowoomba Regional      | 2014 | H       |
| 11 | 0.000       | 24.18 | 0.00    | 3              | 0.00           | 8600.28   | 142        | Gympie Regional         | 2002 | H       |
| 12 | 0.000       | 23.86 | 0.00    | 2              | 0.00           | 413562.96 | 1          | Ipswich City            | 2010 | H       |
| 13 | 0.000       | 23.58 | 0.00    | 3              | 0.00           | 7052.61   | 88         | South Burnett Regional  | 2017 | H       |
| 14 | 0.362       | 23.15 | 0.00    | 3              | 0.00           | 6106.20   | 100        | Murweh Shire            | 2017 | C       |
| 15 | 7.081       | 22.91 | 0.00    | 4              | 0.00           | 835.07    | 1025       | Barcaldine Regional     | 2015 | C       |
| 16 | 0.000       | 22.58 | 0.00    | 3              | 0.00           | 5045.77   | 123        | Southern Downs Regional | 2015 | H       |
| 17 | 0.000       | 19.67 | 0.01    | 2              | 0.00           | 50861.57  | 16         | Toowoomba Regional      | 2015 | H       |
| 18 | 0.000       | 18.70 | 0.02    | 2              | 0.00           | 31299.43  | 26         | Southern Downs Regional | 2009 | H       |
| 19 | 0.000       | 18.11 | 0.02    | 2              | 0.00           | 23251.00  | 35         | Southern Downs Regional | 2003 | H       |
| 20 | 6.123       | 17.30 | 0.05    | 3              | 0.00           | 868.01    | 715        | Gympie Regional         | 2002 | C       |
| 21 | 0.000       | 17.03 | 0.06    | 2              | 0.00           | 13563.09  | 60         | Maranoa Regional        | 2004 | H       |
| 22 | 0.000       | 16.96 | 0.07    | 2              | 0.00           | 13125.57  | 62         | Brisbane City           | 2004 | H       |
| 23 | 0.000       | 16.79 | 0.08    | 2              | 0.00           | 12013.02  | 70         | Noosa Shire             | 2002 | H       |
| 24 | 0.000       | 16.68 | 0.09    | 2              | 0.00           | 11363.67  | 74         | Western Downs Regional  | 2009 | H       |
| 25 | 0.000       | 16.60 | 0.10    | 2              | 0.00           | 10920.93  | 77         | Western Downs Regional  | 2013 | H       |
| 26 | 0.000       | 16.57 | 0.10    | 2              | 0.00           | 10780.91  | 78         | Bundaberg Regional      | 2012 | H       |
| 27 | 0.000       | 16.39 | 0.13    | 2              | 0.00           | 9846.74   | 42         | Bundaberg Regional      | 2004 | H       |
| 28 | 0.000       | 16.29 | 0.15    | 2              | 0.00           | 9353.85   | 87         | Gold Coast City         | 2016 | H       |
| 29 | 0.609       | 16.28 | 0.15    | 3              | 0.00           | 617.54    | 1005       | Maranoa Regional        | 2002 | C       |
| 30 | 0.000       | 16.15 | 0.18    | 2              | 0.00           | 8726.16   | 49         | Blackall Tambo Regional | 2002 | H       |
| 31 | 0.000       | 16.07 | 0.20    | 2              | 0.00           | 8389.54   | 97         | Western Downs Regional  | 2012 | H       |
| 32 | 0.000       | 15.81 | 0.26    | 2              | 0.00           | 7376.41   | 114        | Townsville City         | 2017 | H       |
| 33 | 0.000       | 15.78 | 0.27    | 2              | 0.00           | 7255.49   | 57         | Western Downs Regional  | 2011 | H       |
| 34 | 0.000       | 15.71 | 0.29    | 2              | 0.00           | 7015.39   | 116        | Scenic Rim Regional     | 2016 | H       |

| ID | Radius (Km) | LLR   | P value | Observed cases | Expected cases | RR      | Population | LGA                        | YEAR | Cluster |
|----|-------------|-------|---------|----------------|----------------|---------|------------|----------------------------|------|---------|
| 35 | 0.000       | 15.61 | 0.32    | 2              | 0.00           | 6670.37 | 62         | Ipswich City               | 2015 | H       |
| 36 | 2.487       | 15.47 | 0.36    | 2              | 0.00           | 6212.10 | 131        | Bundaberg Regional         | 2014 | C       |
| 37 | 0.000       | 15.28 | 0.43    | 2              | 0.00           | 5665.25 | 73         | Blackall Tambo Regional    | 2002 | H       |
| 38 | 0.000       | 15.24 | 0.45    | 2              | 0.00           | 5535.95 | 147        | Gold Coast City            | 2013 | H       |
| 39 | 0.855       | 15.19 | 0.46    | 3              | 0.01           | 429.50  | 1445       | Ipswich City               | 2002 | C       |
| 40 | 0.000       | 15.13 | 0.49    | 2              | 0.00           | 5234.97 | 79         | Fraser Coast Regional      | 2016 | H       |
| 41 | 4.702       | 14.98 | 0.52    | 2              | 0.00           | 4860.76 | 173        | Southern Downs Regional    | 2013 | C       |
| 42 | 0.116       | 14.96 | 0.53    | 2              | 0.00           | 4808.87 | 86         | Southern Downs Regional    | 2013 | C       |
| 43 | 0.000       | 14.95 | 0.53    | 2              | 0.00           | 4786.97 | 170        | Ipswich City               | 2006 | H       |
| 44 | 0.000       | 14.82 | 0.59    | 2              | 0.00           | 4496.85 | 187        | Mackay Regional            | 2017 | H       |
| 45 | 1.662       | 14.82 | 0.59    | 2              | 0.00           | 4495.25 | 92         | Toowoomba Regional         | 2015 | C       |
| 46 | 0.000       | 14.76 | 0.61    | 2              | 0.00           | 4351.79 | 187        | Central Highlands Regional | 2004 | H       |
| 47 | 0.000       | 14.72 | 0.63    | 2              | 0.00           | 4263.53 | 97         | Lockyer Valley Regional    | 2011 | H       |
| 48 | 0.000       | 14.68 | 0.64    | 2              | 0.00           | 4194.77 | 97         | Bundaberg Regional         | 2002 | H       |
| 49 | 0.000       | 14.60 | 0.67    | 2              | 0.00           | 4015.17 | 103        | South Burnett Regional     | 2010 | H       |
| 50 | 0.355       | 14.51 | 0.70    | 2              | 0.00           | 3852.09 | 111        | Balonne Shire              | 2013 | C       |
| 51 | 0.000       | 14.41 | 0.74    | 2              | 0.00           | 3659.85 | 113        | Tablelands Regional        | 2017 | H       |
| 52 | 0.849       | 14.41 | 0.74    | 2              | 0.00           | 3659.85 | 113        | Charters Towers Regional   | 2016 | C       |
| 53 | 0.000       | 14.36 | 0.75    | 2              | 0.00           | 3565.20 | 116        | Sunshine Coast Regional    | 2002 | H       |
| 54 | 0.000       | 14.33 | 0.76    | 2              | 0.00           | 3507.69 | 116        | South Burnett Regional     | 2017 | H       |
| 55 | 0.000       | 14.15 | 0.82    | 2              | 0.00           | 3205.91 | 129        | Gympie Regional            | 2008 | H       |
| 56 | 0.000       | 13.98 | 0.87    | 2              | 0.00           | 2954.02 | 140        | Logan City                 | 2006 | H       |
| 57 | 0.136       | 13.91 | 0.89    | 2              | 0.00           | 2852.16 | 145        | Rockhampton Regional       | 2014 | C       |
| 58 | 7.411       | 13.88 | 0.89    | 2              | 0.00           | 2806.15 | 290        | North Burnett Regional     | 2017 | C       |
| 59 | 0.000       | 13.87 | 0.90    | 2              | 0.00           | 2786.93 | 146        | Brisbane City              | 2014 | H       |
| 60 | 6.619       | 13.83 | 0.90    | 2              | 0.00           | 2740.02 | 297        | Ipswich City               | 2016 | C       |
| 61 | 0.456       | 13.82 | 0.90    | 2              | 0.00           | 2730.82 | 298        | Toowoomba Regional         | 2016 | C       |
| 62 | 0.981       | 13.71 | 0.92    | 2              | 0.00           | 2583.44 | 315        | Townsville City            | 2008 | C       |
| 63 | 1.552       | 13.50 | 0.94    | 2              | 0.00           | 2323.39 | 178        | Tablelands Regional        | 2016 | C       |
| 64 | 6.931       | 13.23 | 0.97    | 2              | 0.00           | 2026.45 | 211        | Cassowary Coast Regional   | 2007 | C       |
| 65 | 0.399       | 13.07 | 0.99    | 2              | 0.00           | 1875.36 | 228        | Western Downs Regional     | 2006 | C       |
| 66 | 6.734       | 13.01 | 0.99    | 2              | 0.00           | 1813.87 | 228        | Scenic Rim Regional        | 2016 | C       |
| 67 | 8.480       | 12.93 | 0.99    | 2              | 0.00           | 1742.58 | 467        | Western Downs Regional     | 2007 | C       |
| 68 | 0.000       | 12.71 | 0.99    | 2              | 0.00           | 1564.97 | 260        | Isaac Regional             | 2017 | H       |
| 69 | 0.880       | 12.65 | 1.00    | 2              | 0.00           | 1520.45 | 272        | Whitsunday Regional        | 2014 | C       |
| 70 | 0.475       | 12.55 | 1.00    | 2              | 0.00           | 1440.98 | 287        | Ipswich City               | 2014 | C       |
| 71 | 6.271       | 12.51 | 1.00    | 2              | 0.00           | 1415.28 | 575        | Scenic Rim Regional        | 2015 | C       |
| 72 | 0.237       | 12.41 | 1.00    | 2              | 0.00           | 1342.74 | 308        | Ipswich City               | 2002 | C       |

| ID | Radius<br>(Km) | LLR | P value | Observed<br>cases | Expected<br>cases | RR | Population | LGA | YEAR | Cluster |
|----|----------------|-----|---------|-------------------|-------------------|----|------------|-----|------|---------|
|----|----------------|-----|---------|-------------------|-------------------|----|------------|-----|------|---------|

LLR: log-likelihood ratio; RR: relative risk; LGA: Local Government Area
